# Supplementary material for: Baicalin Alleviates Short-Term Lincomycin-Induced Intestinal and Liver Injury and Inflammation in Infant Mice
Source: MDPI journal article supplement (doi:10.3390/ijms23116072), 2022-05-28
Supplement: s1 [file s1]

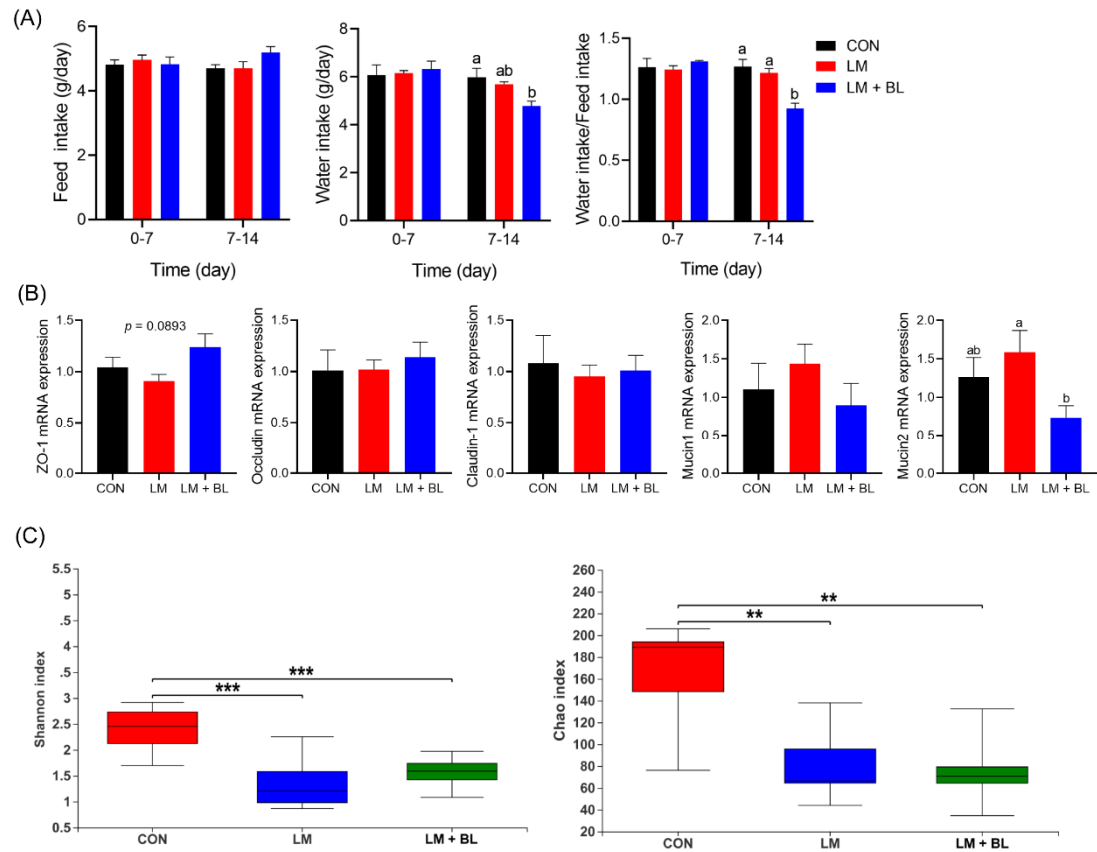

**Figure S1. (A)** Feed intake, water intake, and water intake/feed intake ( $n = 4$ ). **(B)** Relative mRNA expression of *ZO-1*, *Occludin*, *Claudin-1*, *Mucin1* and *Mucin2* in colon ( $n = 12$ ). **(C)** Shannon and Chao index. Values are means, with their standard error means represented by vertical bars. Comparisons of means among groups was performed by one-way ANOVA followed by multi-ple comparisons using the Tukeys' HSD test. Different letters indicate significant differences between the two groups ( $p < 0.05$ ), while the same or no letter indicates insignificant differences ( $p > 0.05$ ).

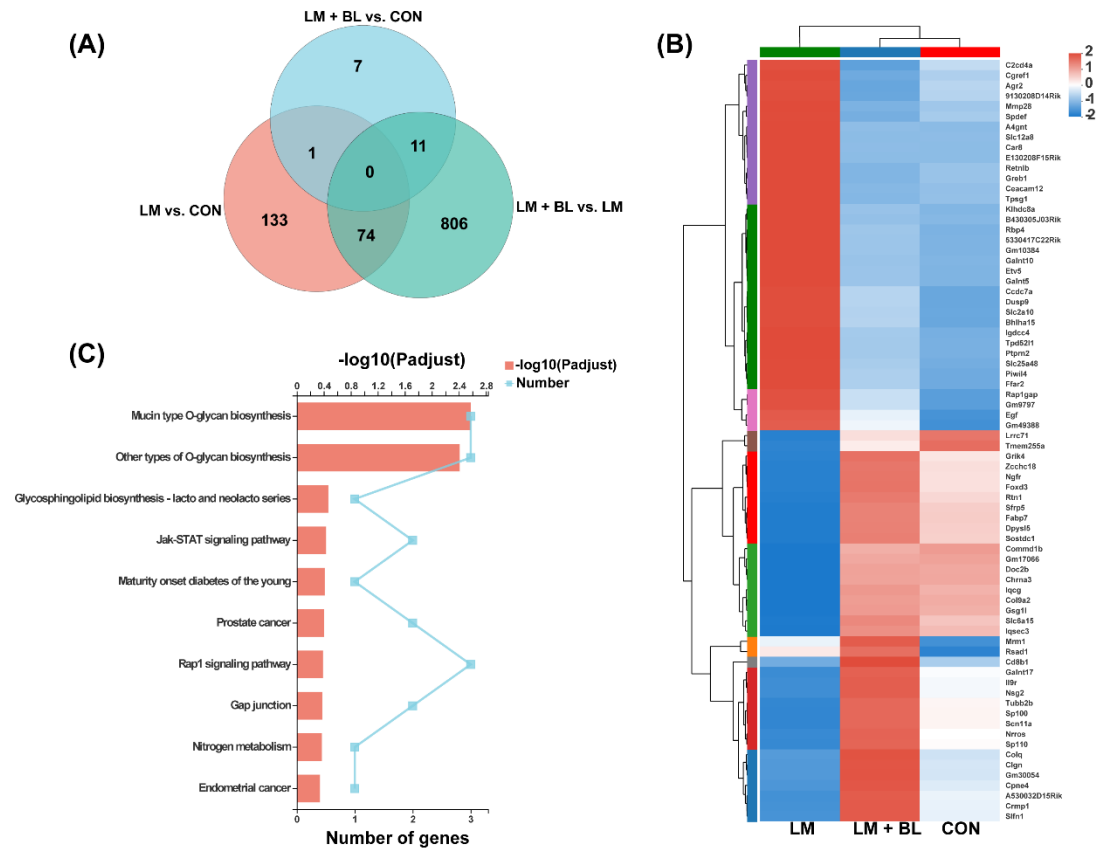

**Figure S2.** Changes in the colonic transcriptome after lincomycin and baicalin treatment in mice. **(A)** Venn diagram of differentially expressed genes in the LM vs. CON, LM + BL vs. LM, and LM + BL vs. CON. **(B)** Heatmap of the colonic gene expression levels in CON, LM, and LM + BL. The colors represent the relative log intensities of the gene expression levels normalized to a reference sample. **(C)** KEGG pathway enrichment analysis of the common genes of the DEGs in LM + BL compared with LM, and LM compared with CON. The top 10 pathways are shown.

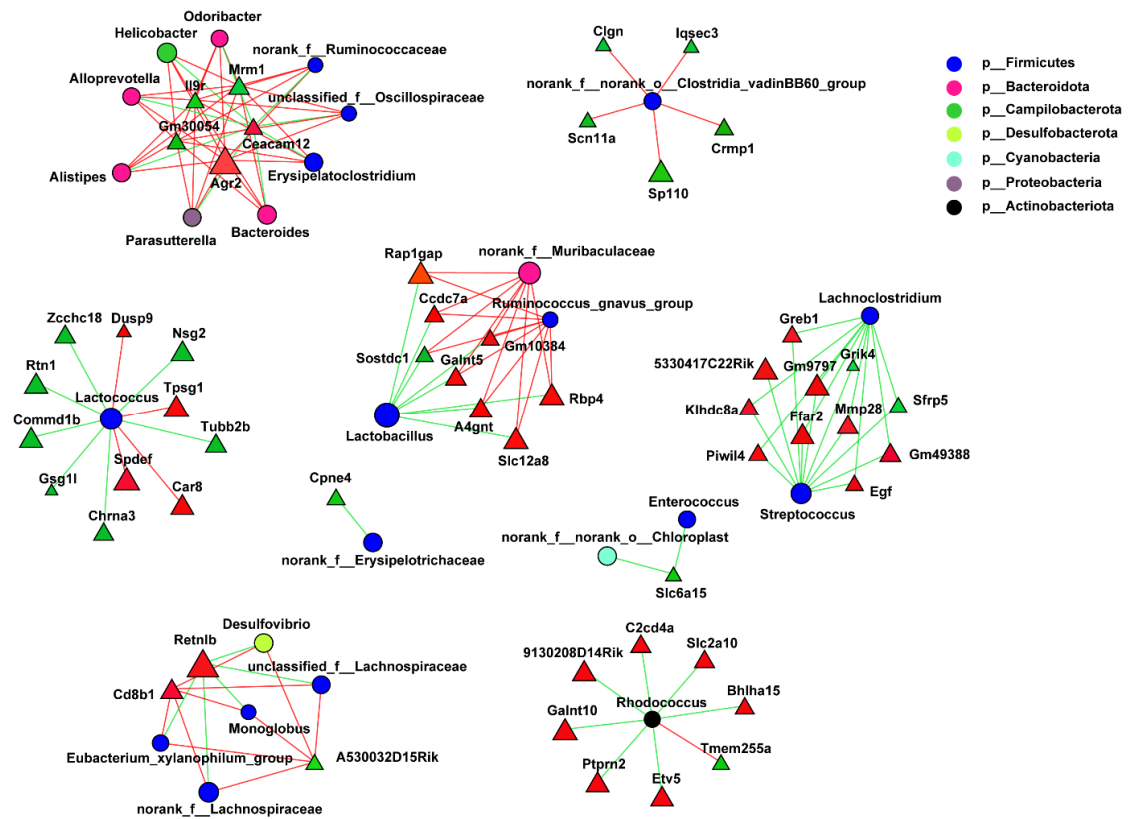

**Figure S3.** A network depicting correlations among microbes and DEGs in LM + BL vs. LM and LM vs. CON. Only correlations with a partial spearman's coefficient > 0.7 and a  $p$  < 0.05 are shown. Bacterial nodes (roundness) are OTUs labeled with their taxonomic classification. The edge color intensity indicates the level of the correlation: red, positive; green, negative. The triangular nodes represent DEGs, where the DEGs up-regulated in LM vs. CON and down-regulated in LM + BL vs. LM are in red, and the DEGs down-regulated in LM vs. CON and up-regulated in LM + BL vs. LM are in green.
